# Supplementary material for: Freezing temperature controlled deep eutectic solvent dispersive liquid–liquid microextraction based on solidification of floating organic droplets for rapid determination of benzoylureas residual in water samples with assistance of metallic salt
Source: Royal Society of Chemistry journal article supplement (doi:10.1039/c7ra11030h), 2017-01-01
Supplement: c7ra11030h1.pdf [file c7ra11030h1.pdf]

Supplementary information

**Freezing temperature controlled deep eutectic solvent dispersive liquid–liquid microextraction based on solidification of floating organic droplets for rapid determination of benzoylureas residual in water samples with assistance of metallic salt**

Miyi Yang, Kun Hong, Xiaoqiang Li, Fangji Ge, Yuqing Tang\*

*China Academy of Chinese Medical Sciences Institute of Chinese Materia Medica,*

*Dongzhimen Nei Ave. Nanxiaojie 16#, Dongcheng District, Beijing 100700, China*

Corresponding author. Tel.: +86 010 84252832; fax: 86 010 84252832.

E-mail address: [yqtan@icmm.ac.cn](mailto:yqtan@icmm.ac.cn) (Y. Tan).

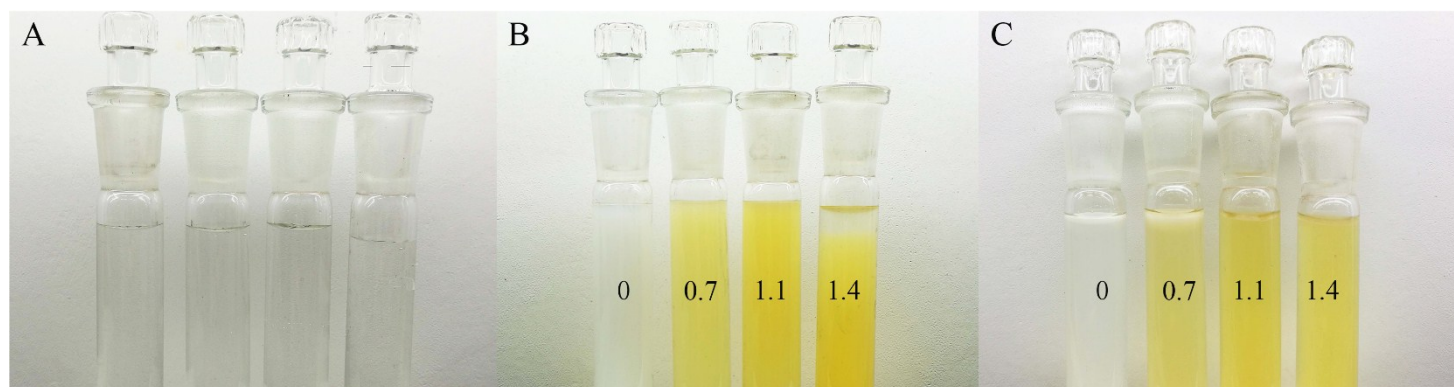

**Figure S1.** The phenomena in the microextraction with different concentration of  $\text{Fe}^{3+}$ .

The number in the figure means the molar concentration of  $\text{FeCl}_3$  in the dispersive-demulsified solvent.

**Table S1** Design for the central composite designs.

| Factors                                                      | Level |         |       | $\alpha$ |
|--------------------------------------------------------------|-------|---------|-------|----------|
|                                                              | Lower | Central | Upper |          |
| ( $V_E$ ) Volume of extractant ( $\mu\text{L}$ )             | 30    | 50      | 70    | 13.64    |
| (C) Concentration of $\text{FeCl}_3$ ( $\text{mol L}^{-1}$ ) | 0.9   | 1.15    | 1.4   | 0.17     |
| ( $V_D$ ) Volume of dispersive solvent ( $\mu\text{L}$ )     | 100   | 200     | 300   | 68.18    |
